# Supplementary material for: The neglect of child neglect: a meta-analytic review of the prevalence of neglect
Source: Soc Psychiatry Psychiatr Epidemiol. 2012 Jul 15;48(3):345–55. doi: 10.1007/s00127-012-0549-y (PMC3568479; doi:10.1007/s00127-012-0549-y)
Supplement: Supplementary file 1 — Supplementary Appendices A–C (PDF 121 kb) [file 127_2012_549_MOESM1_ESM.pdf]

Supplemental Appendix A. *Coding System*

| Variable                                | Coding                              | Description                                                       |
|-----------------------------------------|-------------------------------------|-------------------------------------------------------------------|
| <u><i>Sample characteristics</i></u>    |                                     |                                                                   |
| Gender distribution in sample           | 1 Male                              |                                                                   |
|                                         | 2 Female                            |                                                                   |
|                                         | 3 Mixed                             |                                                                   |
| Continent                               | 1 Australia                         | Including New Zealand                                             |
|                                         | 2 North America                     | Including USA and Canada                                          |
|                                         | 3 Europe                            |                                                                   |
|                                         | 4 Africa                            |                                                                   |
|                                         | 5 South America                     |                                                                   |
|                                         | 6 Asia                              |                                                                   |
| Country's level of economic development | 1 Low-resource                      | According to the World Economic Outlook Database [37]             |
| Ethnicity                               | 2 High-resource                     |                                                                   |
|                                         | 1 African-American                  | Predominance in sample, based on reports in the study             |
|                                         | 2 Caucasian                         |                                                                   |
|                                         | 3 Asian                             |                                                                   |
|                                         | 4 Hispanic                          |                                                                   |
| SES                                     | 1 Low                               | Predominance in sample, based on reports in the study             |
|                                         | 2 Moderate                          |                                                                   |
|                                         | 3 High                              |                                                                   |
| Respondent                              | 1 Child                             |                                                                   |
|                                         | 2 Adult                             |                                                                   |
| <u><i>Procedural moderators</i></u>     |                                     |                                                                   |
| Evidence maltreatment                   | 1 Informant                         |                                                                   |
|                                         | 2 Self-report                       |                                                                   |
| Witnessing domestic violence            | 1 Several indicators                | Coded for emotional neglect                                       |
|                                         | 2 Witnessing domestic violence only |                                                                   |
| Type of instrument                      | 1 Interview                         |                                                                   |
|                                         | 2 Questionnaire                     |                                                                   |
| Instrument validated                    | 1 No                                |                                                                   |
|                                         | 2 Yes                               |                                                                   |
| Number of questions regarding neglect   |                                     | Continuous; if a range was provided, the minimum number was coded |
| Sampling procedure                      | 1 Randomized                        |                                                                   |
|                                         | 2 Convenience                       |                                                                   |
| Response rate                           | 1 Low to moderate                   | < 80%                                                             |
|                                         | 2 High                              | ≥ 80%                                                             |
| Sample size                             | 1 Small to moderate                 | < 1,000                                                           |
|                                         | 2 Large                             | ≥ 1,000                                                           |

Supplemental Appendix B. References of publications participating in the meta-analyses

Ansara D, Cohen MM, Gallop R, Kung R, Schei B (2005) Predictors of women's physical health problems after childbirth. *J Psychosom Obstet Gynecol* 26: 115-125. doi: 10.1080/01443610400023064

Bensley L, Van Eenwyk J, Wynkoop Simmons K (2003) Childhood family violence history and women's risk for intimate partner violence and poor health. *Am J Prev Med* 25: 38-44. doi: 10.1016/S0749-3797(03)00094-1

Chapman DP, Whitfield CL, Felitti VJ, Dube SR, Edwards VJ, Anda RF (2004) Adverse childhood experiences and the risk of depressive disorders in adulthood. *J Affect Disord* 82: 217-225. doi: 10.1016/j.jad.2003.12.013

Clemmons JC, DiLillo D, Martinez IG, Degue S, Jeffcott M (2003) Co-occurring forms of child maltreatment and adult adjustment reported by Latina college students. *Child Abus Negl* 27: 751-767. doi: 10.1016/S0145-2134(03)00112-1

Elliott DM (1997) Traumatic events: Prevalence and delayed recall in the general population. *J Consult Clin Psychol* 65: 811-820. doi: 10.1037//0022-006X.65.5.811

Fergusson DM, Horwood LJ (1998) Exposure to interparental violence in childhood and psychosocial adjustment in young adulthood. *Child Abus Negl* 22: 339-357. doi: 10.1016/S0145-2134(98)00004-0

Finkelhor D, Ormrod R, Turner H, Hamby SL (2005) The victimization of children and youth: A comprehensive, national survey. *Child Maltreatment* 10: 5-25. doi: 10.1177/1077559504271287

Gagné MH, Lavoie F, Hébert M (2005) Victimization during childhood and revictimization in dating relationships in adolescent girls. *Child Abus Negl* 29: 1155-1172. doi: 10.1016/j.chiabu.2004.11.009

Hussey JM, Chang JJ, Kotch JB (2006) Child maltreatment in the United States: Prevalence, risk factors, and adolescent health consequences. *Pediatr* 118: 933-942. doi: 10.1542/peds.2005-2452

Jirapramukpitak T, Prince M, Harpham T (2005) The experience of abuse and mental health in the young Thai population. *Soc Psychiatr Psychiatr Epidemiol* 40: 955-963. doi: 10.1007/s00127-005-0983-1

May-Chahal C, Cawson P (2005) Measuring child maltreatment in the United Kingdom: A study of the prevalence of child abuse and neglect. *Child Abus Negl* 29: 969-984. doi: 10.1016/j.chiabu.2004.05.009

Meston CM, Heiman JR, Trapnell PD, Carlin AS (1999). Ethnicity, desirable responding, and self-reports of abuse: A comparison of European- and Asian-ancestry undergraduates. *J Consult Clin Psychol* 67: 139-144. doi: 10.1037//0022-006X.67.1.139

Scher, CD, Forde DR, McQuaid JR, Stein MB (2004) Prevalence and demographic correlates of childhood maltreatment in an adult community sample. *Child Abuse Negl* 28: 167-180. doi: 10.1016/j.chiabu.2003.09.012

Thompson MP, Kaslow NJ, Lane DB, Kingree JB (2000) Childhood maltreatment, PTSD and suicidal behavior among African American females. *J Interpers Violence* 15: 3-15. doi: 10.1177/088626000015001001

Young SYN, Hansen, CJ, Gibson, RL, Ryan MAK (2006) Risky alcohol use, age at onset of drinking, and adverse childhood experiences in young men entering the US marine corps. *Arch Pediatr Adolesc Med* 160: 1207-1214. doi: 10.1001/archpedi.160.12.1207

Supplemental Appendix C. *Studies in which the prevalence of physical or emotional neglect was self-reported*

| Study                           | Gender | N      | Prevalence (%) | Continent     | Economic Development <sup>1</sup> | Ethnicity <sup>2,3</sup> (predominant) | SES <sup>3</sup> | Respondent |
|---------------------------------|--------|--------|----------------|---------------|-----------------------------------|----------------------------------------|------------------|------------|
| <i>Physical neglect</i>         |        |        |                |               |                                   |                                        |                  |            |
| Finkelhor et al. (2005)         | Female | 1,015  | 1.4            | North America | High                              | Caucasian                              | High             | Child      |
| Finkelhor et al. (2005)         | Male   | 1,015  | 1.5            | North America | High                              | Caucasian                              | High             | Child      |
| Hussey et al. (2006)            | Mixed  | 10,828 | 11.7           | North America | High                              | --                                     | --               | Adult      |
| May-Chahal et al. (2005)        | Female | 1,635  | 7.0            | Europe        | High                              | --                                     | --               | Adult      |
| May-Chahal et al. (2005)        | Male   | 1,234  | 6.0            | Europe        | High                              | --                                     | --               | Adult      |
| Meston et al. (1999; Asian)     | Female | 278    | 46.0           | North America | High                              | Asian                                  | Moderate         | Adult      |
| Meston et al. (1999; non-Asian) | Female | 391    | 32.0           | North America | High                              | Caucasian                              | Moderate         | Adult      |
| Meston et al. (1999; Asian)     | Male   | 192    | 64.0           | North America | High                              | Asian                                  | Moderate         | Adult      |
| Meston et al. (1999; non-Asian) | Male   | 191    | 46.0           | North America | High                              | Caucasian                              | Moderate         | Adult      |
| Scher et al. (2004)             | Female | 618    | 14.2           | North America | High                              | Caucasian                              | Moderate         | Adult      |
| Scher et al. (2004)             | Male   | 349    | 22.1           | North America | High                              | Caucasian                              | Moderate         | Adult      |
| Thompson et al. (2000)          | Female | 178    | 30.0           | North America | High                              | African American                       | Low              | Adult      |
| Young et al. (2006)             | Male   | 41,482 | 16.9           | North America | High                              | Caucasian                              | Moderate         | Adult      |
| <i>Emotional neglect</i>        |        |        |                |               |                                   |                                        |                  |            |
| Ansara et al. (2005)            | Female | 200    | 3.5            | North America | High                              | --                                     | Moderate         | Adult      |
| Bensley et al. (2003)           | Female | 3,527  | 14.4           | North America | High                              | Caucasian                              | High             | Adult      |
| Chapman et al. (2004)           | Female | 5,108  | 13.2           | North America | High                              | Caucasian                              | Moderate         | Adult      |
| Chapman et al. (2004)           | Male   | 4,352  | 11.0           | North America | High                              | Caucasian                              | Moderate         | Adult      |
| Clemmons et al. (2003)          | Female | 112    | 33.9           | North America | High                              | Hispanic American                      | Moderate         | Child      |
| Elliott (1997)                  | Mixed  | 505    | 25.0           | North America | High                              | Caucasian                              | Moderate         | Adult      |
| Fergusson & Horwood (1998)      | Female | 515    | 40.0           | Australia     | High                              | --                                     | --               | Adult      |
| Fergusson & Horwood (1998)      | Male   | 504    | 40.0           | Australia     | High                              | --                                     | --               | Adult      |
| Gagné et al. (2005)             | Female | 622    | 23.6           | North America | High                              | --                                     | Low              | Child      |
| Jirapramukpitak et al. (2005)   | Female | 199    | 8.0            | Asia          | Low                               | --                                     | --               | Adult      |
| Jirapramukpitak et al. (2005)   | Male   | 144    | 9.7            | Asia          | Low                               | --                                     | --               | Adult      |
| Scher et al. (2004)             | Female | 618    | 5.3            | North America | High                              | Caucasian                              | Moderate         | Adult      |
| Scher et al. (2004)             | Male   | 349    | 4.9            | North America | High                              | Caucasian                              | Moderate         | Adult      |
| Stephenson et al. (2006)        | Mixed  | 1240   | 80.1           | Asia          | Low                               | --                                     | Low              | Child      |
| Thompson et al. (2000)          | Female | 178    | 33.0           | North America | High                              | African American                       | Low              | Adult      |
| Young et al. (2006)             | Male   | 41,482 | 15.4           | North America | High                              | Caucasian                              | Moderate         | Adult      |

<sup>1</sup>high means high-resource, low means low-resource; <sup>2</sup>for the subset of studies originating from North America; <sup>3</sup>-- means 'not reported'
